# Supplementary material for: TRPA1 and TPRV1 Ion Channels Are Required for Contact Lens-Induced Corneal Parainflammation and Can Modulate Levels of Resident Corneal Immune Cells
Source: PubMed Central journal article supplement — Invest Ophthalmol Vis Sci. 2023 Aug 16;64(11):21. doi: 10.1167/iovs.64.11.21 (PMC10434714; doi:10.1167/iovs.64.11.21), 2023-08-16
Supplement: iovs-64-11-21_s001.pdf [file iovs-64-11-21_s001.pdf]

**Supplemental Material**

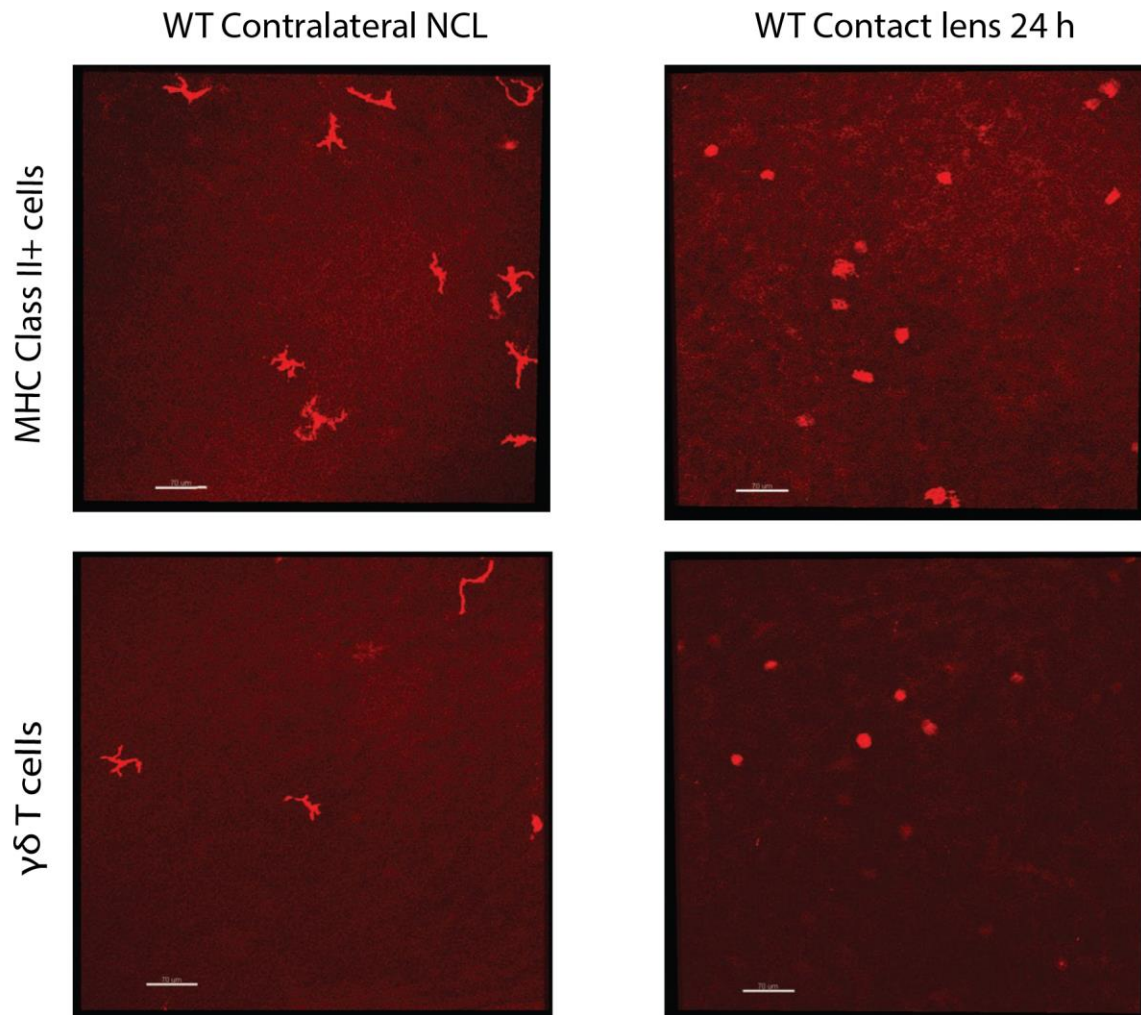

**Supplemental Fig. S1.** Immunofluorescence imaging showing increased circularity of MHC Class II+ cells (A) and  $\gamma\delta$  T cells (B) in the corneas of wild-type mice after contact lens wear for 24 h. Scale bar = 70  $\mu\text{m}$ .
